# Supplementary material for: Synthesis of high-temperature CO2 adsorbents from organo-layered double hydroxides with markedly improved CO2 capture capacity
Source: Royal Society of Chemistry journal article supplement (doi:10.1039/c2ee21409a), 2012-01-01
Supplement: c2ee21409a.pdf [file c2ee21409a.pdf]

Supporting information

Synthesis of high-temperature CO<sub>2</sub> adsorbents from organo-  
layered double hydroxide with markedly improved CO<sub>2</sub> capture  
capacity

Qiang Wang\*, Hui Huang Tay, Ziyi Zhong, Jizhong Luo\*, Armando Borgna

Institute of Chemical and Engineering Sciences (ICES), A-STAR, 1 Pesek Road, Jurong Island,  
62733 Singapore

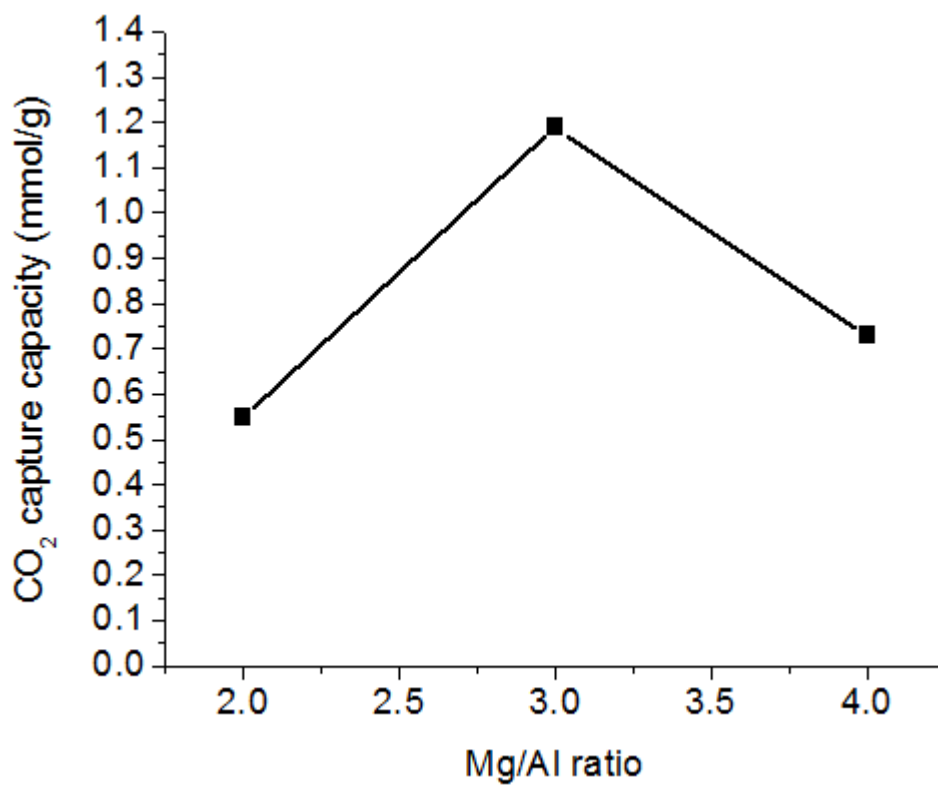

**Figure S1.** Effect of Mg/Al ratio on the CO<sub>2</sub> capture capacity of Mg<sub>x</sub>Al<sub>1</sub>-stearate ( $x = 2, 3$  and  $4$ ) evaluated at 200 °C.

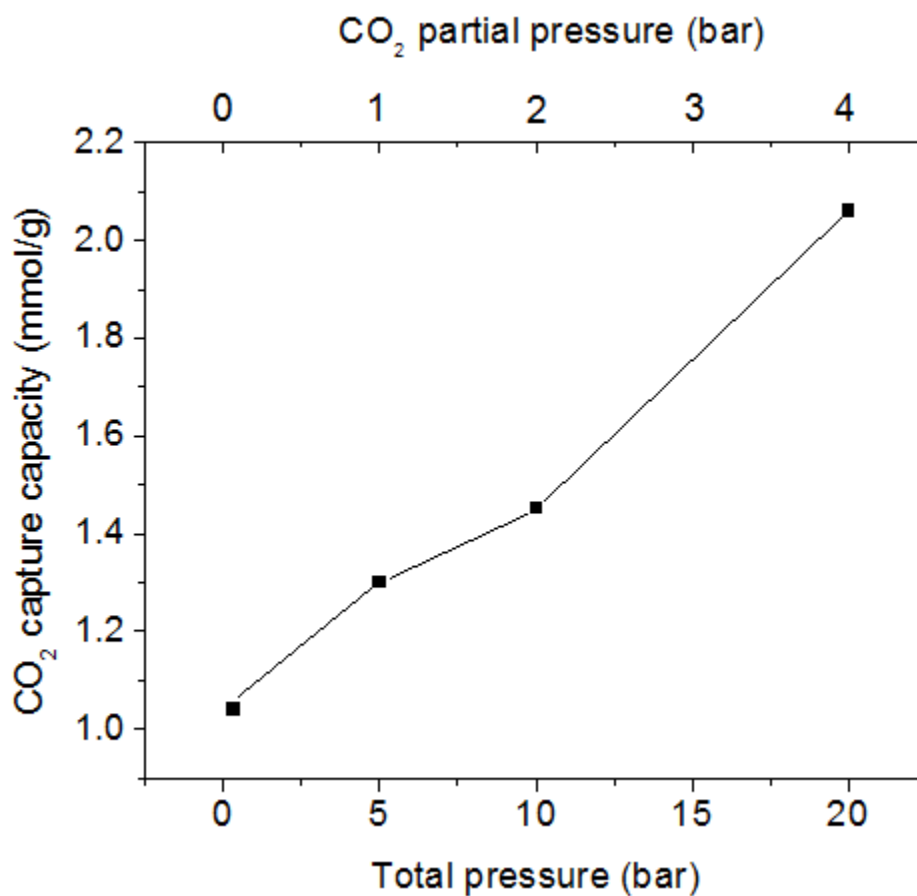

**Figure S2.** The effect of operating pressure (CO<sub>2</sub> partial pressure) on the CO<sub>2</sub> capture capacity of Mg<sub>3</sub>Al<sub>1</sub>-stearate derived adsorbent. Testing condition: 1.5 g adsorbent, 20% CO<sub>2</sub>, 20 % Ar in N<sub>2</sub> (total flow rate 100 ml/min), 400 °C.

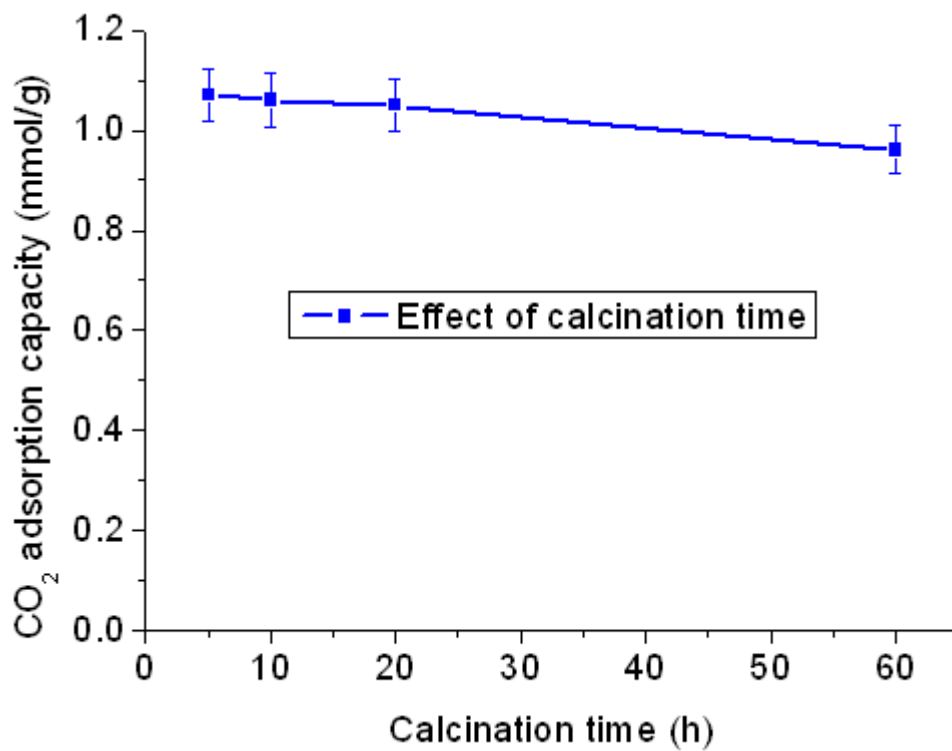

**Figure S3.** The effect of calcination time on the CO<sub>2</sub> capture capacity of the Mg<sub>3</sub>Al<sub>1</sub>-stearate derived mixed oxide. Calcination temperature: 400 °C, adsorption temperature: 400 °C.

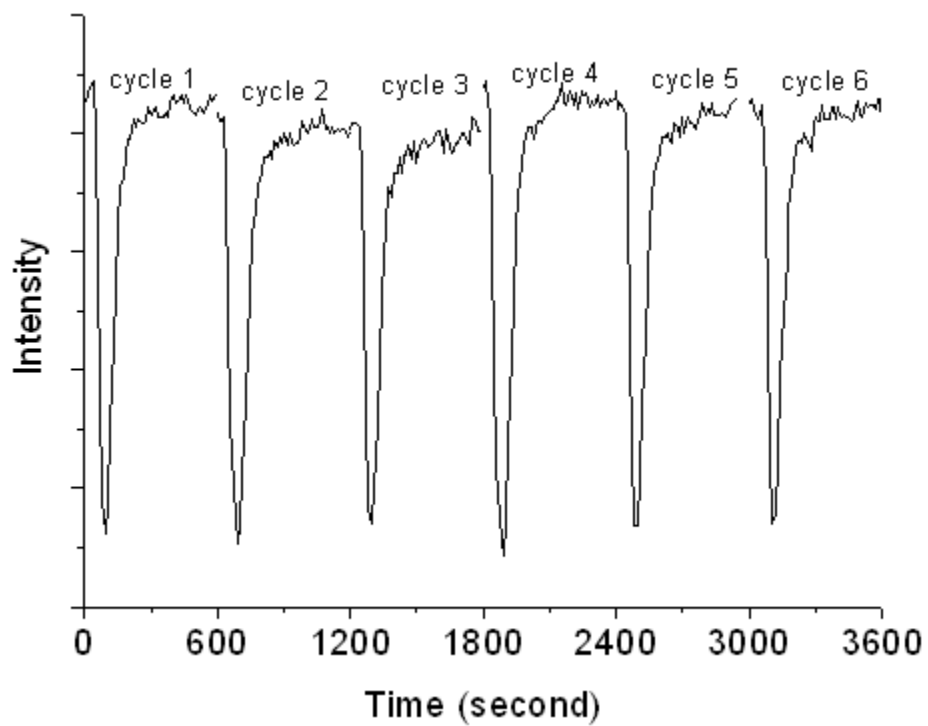

**Figure S4.** CO<sub>2</sub> adsorption/desorption cycling test for Mg<sub>3</sub>Al<sub>1</sub>-stearate derived mixed oxide.

Adsorption temperature: 200 °C, desorption temperature 400 °C.

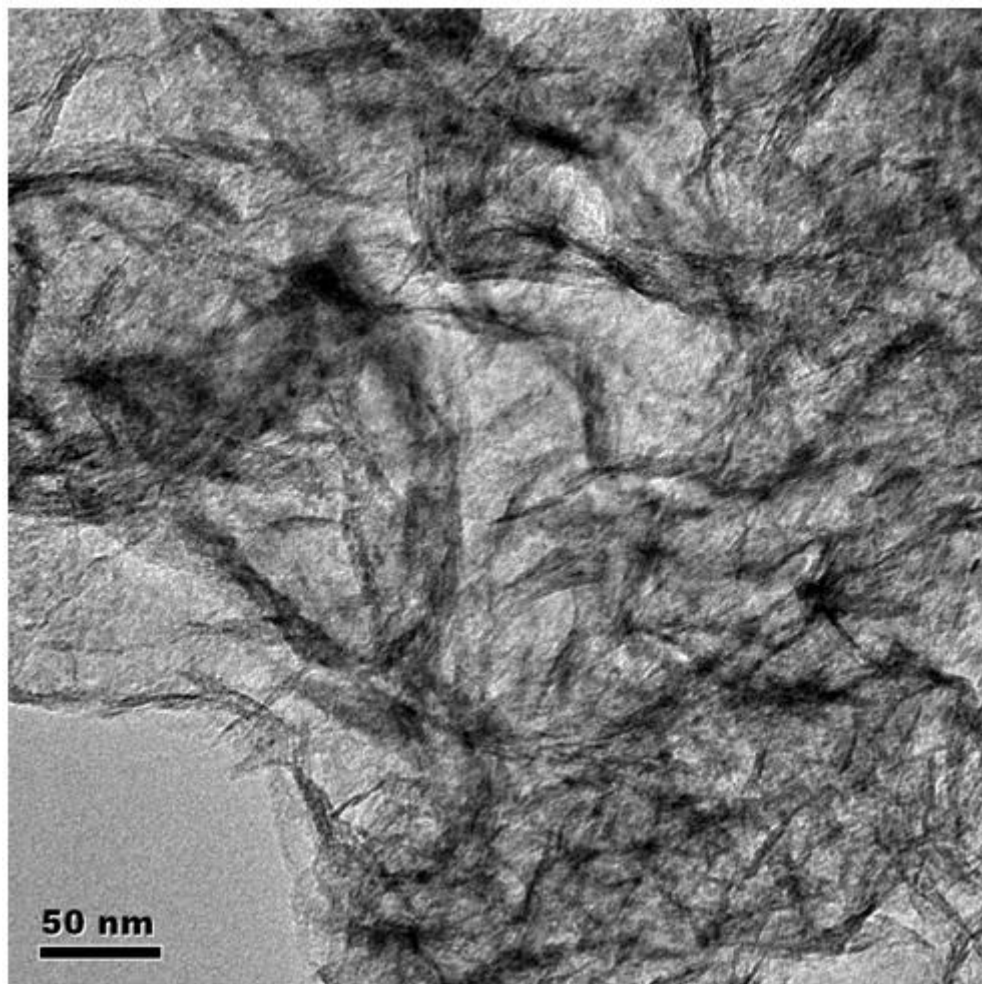

**Figure S5.** TEM image of the calcined Mg<sub>3</sub>Al<sub>1</sub>-stearate (400 °C, 5 h, in air).

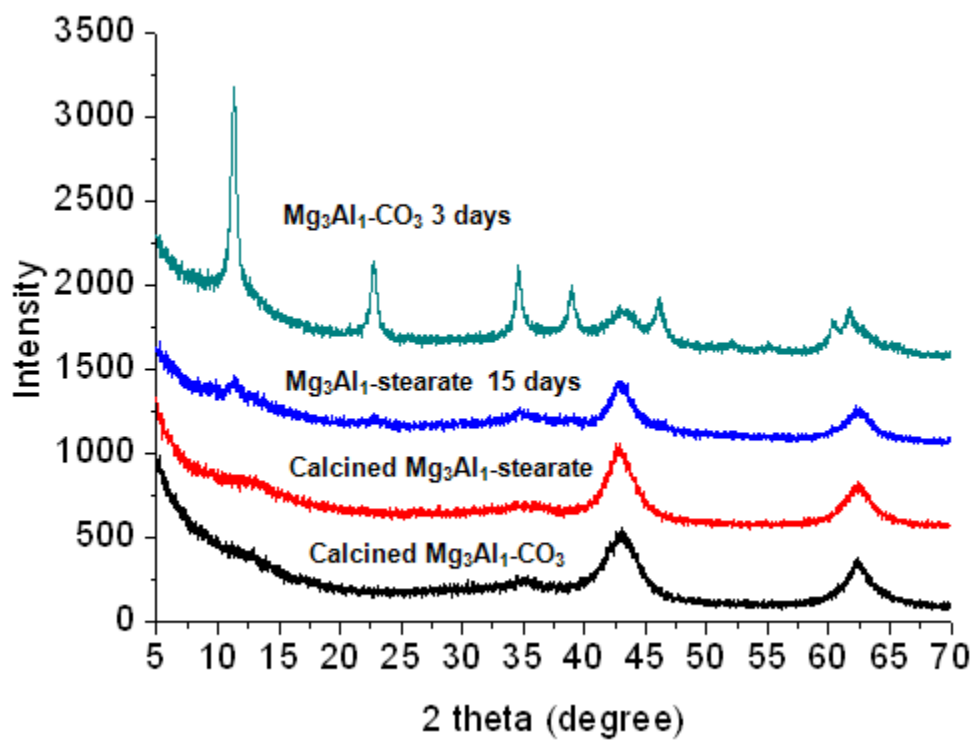

**Figure S6.** XRD patterns of the Mg<sub>3</sub>Al<sub>1</sub>-CO<sub>3</sub> and Mg<sub>3</sub>Al<sub>1</sub>-stearate after calcination at 400 °C and exposure to ambient atmosphere for several days.
